# Supplementary material
Source: publisher site journal article supplement (https://www.dovepress.com/article/439995)
Supplement: Supplementary file 1 [file get_supplementary_file.php]

***Annex 1. Search strategies***

●Pubmed.

(((ischemic stroke) OR (hemorrhagic stroke) OR (cerebral stroke[MeSH Terms]) OR (cerebral hemorrhage[MeSH Terms]) AND (seizures) OR (epilepsy) OR (epilepsy[MeSH Terms]) OR (seizures[MeSH Terms])) AND ((prognosis[MeSH Terms]) OR (risk assessment[MeSH Terms]) OR (predictive value of tests[MeSH Terms]) OR (hazard model, proportional[MeSH Terms]))) NOT ((treatment[MeSH Terms]) OR (pregnancy[MeSH Terms]) OR (therapeutics[MeSH Terms]) OR (treatment outcome[MeSH Terms])) Filters: Middle Aged: 45-64 years, Aged: 65+ years, from 2010 - 2020

●Scopus.

( TITLE-ABS-KEY ( stroke ) AND TITLE-ABS-KEY ( epilepsy ) OR TITLE-ABS-KEY ( seizures ) AND TITLE-ABS-KEY ( "prognostic model" ) OR TITLE-ABS-KEY ( "risk model" ) AND NOT TITLE-ABS-KEY ( pediatric ) ) AND PUBYEAR > 2009 AND PUBYEAR < 2021

●LILACS/BVS.

("enfermedad cerebrovascular" OR ictus AND epilepsia OR convulsion*) AND (pronostico OR "modelo de riesgo")

●Google Scholar.

stroke epilepsy predictors "post stroke epilepsy" -pediatric -traumatic -malformation -pregnancy

***Annex 2. Abbreviation index***

ARB: Angiotensin Receptor Blocker

ASPECTS: Alberta Stroke Program Early CT Score

AUC: Area Under the Curve

BVS: Biblioteca Virtual en Salud

ASS: Acute symptomatic seizures

ICD: International Classification of Diseases

CHARMS: Critical Appraisal and Data Extraction for Systematic Reviews of Pre-diction Modelling Studies

UNP: Unprovoked seizures

LS: Late seizure

DM: Diabetes mellitus

DPP-4: Dipeptidyl-peptidase 4

RCT: Randomized controlled trial

EEG: Electroencephalogram

PSE: Post stroke epilepsy

GQH: Institute of Quality Assurance Hessen

HR: Hazard ratio

HBP: High blood pressure

ILAE: International League Against Epilepsy

LILACS: Literatura Latinoamericana y del Caribe en Ciencias de la Salud

MESH: Medical Subject Headings

mRs: Modified Rankin Scale

NIHSS: National Institutes of Health Stroke Scale

NHIRD: National Health Insurance Research Database

OR: Odds ratio

PRISMA: Preferred Reporting Items for Systematic Reviews and Meta-Analyses

PROBAST: Prediction Model Risk of Bias Assessment Tool

RevMan: Review Manager

ICU: Intensive Care Unit

NPV: Negative Predictive Value

PPV: Positive Predictive Value
